# Supplementary material for: Regional Variation in the Interpretation of Contact Precautions for Multidrug-resistant Gram-negative bacteria: a cross-sectional survey
Source: bioRxiv or medRxiv preprint supplement (doi:10.1101/2024.03.29.24305013), 2024-03-30
Supplement: Supplementary file [file media-1.pdf]

**Table A1** Characteristics of the eleven hospitals from the Southwest region of the Netherlands<sup>1</sup>.

| Characteristics                      | Hospital 1                                     | Hospital 2                       | Hospital 3                       | Hospital 4                       | Hospital 5                       | Hospital 6                                 | Hospital 7                       | Hospital 8            | Hospital 9            | Hospital 10           | Hospital 11           |
|--------------------------------------|------------------------------------------------|----------------------------------|----------------------------------|----------------------------------|----------------------------------|--------------------------------------------|----------------------------------|-----------------------|-----------------------|-----------------------|-----------------------|
|                                      | University hospital                            | Non-university teaching hospital | Non-university teaching hospital | Non-university teaching hospital | Non-university teaching hospital | Non-university teaching hospital           | Non-university teaching hospital | Non-teaching hospital | Non-teaching hospital | Non-teaching hospital | Non-teaching hospital |
| No. of hospital beds                 | 1233<br>(including Sophia children's hospital) | Not available                    | 564                              | 484                              | 341                              | 332                                        | Not available                    | 364                   | ≈290                  | 194                   | 189                   |
| No. of single-occupancy rooms        | 576<br>(excluding Sophia children's hospital)  | 145                              | 80                               | 248                              | 26                               | 84 (including ICU and mother/child centre) | 4                                | 49                    | 19                    | 50                    | 33                    |
| No. of isolation rooms with anteroom | 54                                             | 62                               | 33                               | 66                               | 12                               | 7                                          | 0                                | 18                    | 7                     | 10                    | 5                     |
| Clinical hospital admissions         | 30,771                                         | 32,022                           | 21,249                           | 24,561                           | 27,726                           | 13,485                                     | Not available                    | 35,475                | ≈10,000               | 16,340                | 9,506                 |
| Outpatient clinic visits             | 659,317                                        | 402,758                          | 29,5567                          | 107,249 <sup>2</sup>             | 76,729 <sup>2</sup>              | 266,296 <sup>3</sup>                       | 126,898                          | 307,226 <sup>3</sup>  | ≈50,000               | 42,000                | 165,695               |

ICU intensive care unit.

<sup>1</sup>Data are from 2021.

<sup>2</sup> Only number of first outpatient clinic visits available.

<sup>3</sup> Only number of consultations available.

**Table A2** IPC measures recommended by the Dutch, ESCMID and ECDC guidelines.

|                                                                                               | <b>Dutch guidelines</b>                     |                                                                                                                                                  | <b>ESCMID guideline [1]</b>                            |                                                                                      | <b>ECDC guideline on CPE [2]</b>                                                                      |
|-----------------------------------------------------------------------------------------------|---------------------------------------------|--------------------------------------------------------------------------------------------------------------------------------------------------|--------------------------------------------------------|--------------------------------------------------------------------------------------|-------------------------------------------------------------------------------------------------------|
| <b>IPC measures</b>                                                                           | Strict isolation [3]                        | Contact isolation [4]                                                                                                                            | Contact precautions: endemic MDR- <i>P. aeruginosa</i> | Contact precautions: endemic ESBL-E (with the exception of <i>Escherichia coli</i> ) | Contact precautions                                                                                   |
| <b>Type of room</b>                                                                           | Isolation room <sup>1</sup>                 | Single-occupancy room, or under exceptional circumstances a multiple-occupancy room provided there is a 1.5 meter space around the patient's bed | Isolation room                                         | Single room                                                                          | Isolation room with en suite or bathroom facilities designated for use by known carriers, or commodes |
| <i>Door allowed to be open</i>                                                                | N/A                                         | Yes                                                                                                                                              | N/A                                                    | No recommendations                                                                   | N/A                                                                                                   |
| <i>Patient allowed to leave the room (for other reasons than e.g., operations, radiology)</i> | No                                          | Yes, under specific conditions                                                                                                                   | No recommendations                                     | No recommendations                                                                   | No recommendations                                                                                    |
| <b>PPE for HCW</b>                                                                            | Gloves before entering the room             | Gloves during contact with the patient or contact with the patient's direct environment                                                          | Gloves before entering the room                        | Gloves before entering the room                                                      | Gloves during direct contact with the patient or their immediate surroundings and/or surfaces.        |
|                                                                                               | Long-sleeved gown before entering the room  |                                                                                                                                                  | Gown before entering the room                          | Gown before entering the room                                                        | Gown/apron during direct contact with the patient or their immediate surroundings and/or surfaces.    |
|                                                                                               | Mask (type of mask dependent on the type of |                                                                                                                                                  |                                                        |                                                                                      |                                                                                                       |

|                                     |                                                                                                                          |                                                                                                             |                                                                                                                                                                                         |                                                                                                                                                                                         |                                                                                                                                                                                            |
|-------------------------------------|--------------------------------------------------------------------------------------------------------------------------|-------------------------------------------------------------------------------------------------------------|-----------------------------------------------------------------------------------------------------------------------------------------------------------------------------------------|-----------------------------------------------------------------------------------------------------------------------------------------------------------------------------------------|--------------------------------------------------------------------------------------------------------------------------------------------------------------------------------------------|
|                                     | microorganism) before entering the room                                                                                  |                                                                                                             |                                                                                                                                                                                         |                                                                                                                                                                                         |                                                                                                                                                                                            |
|                                     | Hair cap (only for MRSA)                                                                                                 |                                                                                                             |                                                                                                                                                                                         |                                                                                                                                                                                         |                                                                                                                                                                                            |
| <b>Physiotherapy for inpatients</b> | No recommendations on whether and where physiotherapy can take place, and on recommended PPE use                         | No recommendations on whether and where physiotherapy can take place, and on recommended PPE use            | No recommendations on whether and where physiotherapy can take place, and on recommended PPE use                                                                                        | No recommendations on whether and where physiotherapy can take place, and on recommended PPE use                                                                                        | No recommendations on whether and where physiotherapy can take place, and on recommended PPE use                                                                                           |
| <b>Visitors of inpatients</b>       |                                                                                                                          |                                                                                                             |                                                                                                                                                                                         |                                                                                                                                                                                         |                                                                                                                                                                                            |
| <i>PPE</i>                          | Mask (type of mask dependent on the type of microorganism)                                                               | No specific measures                                                                                        | No recommendations                                                                                                                                                                      | No recommendations                                                                                                                                                                      | No recommendations                                                                                                                                                                         |
|                                     | Gown                                                                                                                     |                                                                                                             |                                                                                                                                                                                         |                                                                                                                                                                                         |                                                                                                                                                                                            |
| <i>Other</i>                        | Visitor is not allowed to visit another patient                                                                          | No specific measures                                                                                        | No recommendations                                                                                                                                                                      | No recommendations                                                                                                                                                                      | No recommendations                                                                                                                                                                         |
| <i>Rooming-in</i>                   | No recommendations                                                                                                       | No recommendations                                                                                          | No recommendations                                                                                                                                                                      | No recommendations                                                                                                                                                                      | No recommendations                                                                                                                                                                         |
| <b>Cleaning and disinfection</b>    | Daily cleaning of the patient room and anteroom and terminal cleaning and disinfection before admission of a new patient | Daily cleaning of the patient room and terminal cleaning and disinfection before admission of a new patient | Implement regular environmental cleaning procedures, which include detergents or disinfectants, depending on local practice to reduce the transmission rate. Ensure cleaning of patient | Implement regular environmental cleaning procedures, which include detergents or disinfectants, depending on local practice to reduce the transmission rate. Ensure cleaning of patient | Enhanced cleaning should be performed, especially for areas in close proximity to CRE carriers. Terminal disinfection of rooms should be performed upon transfer or discharge of patients. |

---

care equipment  
and the  
environment.

care equipment  
and the  
environment.

---

ECDC European Centre for Disease Prevention and Control, *ESBL-E* extended-spectrum  $\beta$ -lactamase-producing Enterobacterales, *ESCMID* European Society of Clinical Microbiology and Infectious Diseases, *HCW* healthcare worker, *IPC* infection prevention and control, *MDR-P.* aeruginosa multidrug-resistant *Pseudomonas aeruginosa*, *MRSA* meticillin-resistant *Staphylococcus aureus*, *N/A* not applicable, *PPE* personal protective equipment.

<sup>1</sup> An isolation room is defined as a single-occupancy room with anteroom and pressure differences [5].

## References

- [1] Tacconelli E, Cataldo MA, Dancer SJ, De Angelis G, Falcone M, Frank U, et al. ESCMID guidelines for the management of the infection control measures to reduce transmission of multidrug-resistant Gram-negative bacteria in hospitalized patients. Clin Microbiol Infect 2014;20 Suppl 1:1-55.
- [2] Magiorakos AP, Burns K, Rodríguez Baño J, Borg M, Daikos G, Dumpis U, et al. Infection prevention and control measures and tools for the prevention of entry of carbapenem-resistant Enterobacteriaceae into healthcare settings: guidance from the European Centre for Disease Prevention and Control. Antimicrob Resist Infect Control 2017;6:113.
- [3] Dutch Working Party on Infection Prevention (WIP). Strikte isolatie. 2006.
- [4] Dutch Working Party on Infection Prevention (WIP). Contactisolatie. 2006.
- [5] Dutch Working Party on Infection Prevention (WIP). Bouw- en inrichtingseisen isolatie-afdeling Ventilatie isolatiekamers. 2004.

**Table A3** IPC measures for visitors of inpatients (n=11 hospitals).

| <b>Transmission-based precautions</b>                                           | <b>CPE</b> | <b>CPPA</b> | <b>ESBL-E</b> |
|---------------------------------------------------------------------------------|------------|-------------|---------------|
| <b>IPC measures for visitor(s)<sup>1</sup></b>                                  | 11 (100)   | 11 (100)    | 10 (90.9)     |
| Hand disinfection                                                               | 11 (100)   | 11 (100)    | 10 (100)      |
| Disposable gown and non-sterile gloves                                          | 1 (9.1)    | 1 (9.1)     | 1 (10.0)      |
| Disposable gown                                                                 | 1 (9.1)    | 1 (9.1)     | 0 (0.0)       |
| Surgical mask type IIR, disposable gown, non-sterile gloves, and hair cap       | 1 (9.1)    | 1 (9.1)     | 0 (0.0)       |
| <b>Temporary room leave by visitor(s) for a toilet visit is allowed</b>         |            |             |               |
| Yes                                                                             | 4 (36.4)   | 4 (36.4)    | 5 (45.5)      |
| No                                                                              | 6 (54.5)   | 6 (54.5)    | 4 (36.4)      |
| Not applicable <sup>2</sup>                                                     | 1 (9.1)    | 1 (9.1)     | 2 (18.2)      |
| <b>Temporary room leave by visitor(s) for use of the coffee area is allowed</b> |            |             |               |
| Yes                                                                             | 4 (36.4)   | 4 (36.4)    | 6 (54.5)      |
| No                                                                              | 6 (54.5)   | 6 (54.5)    | 3 (27.3)      |
| Not applicable <sup>2</sup>                                                     | 1 (9.1)    | 1 (9.1)     | 2 (18.2)      |
| <b>Rooming-in is allowed</b>                                                    |            |             |               |
| Yes                                                                             | 10 (90.9)  | 10 (90.9)   | 9 (81.8)      |
| No                                                                              | 1 (9.1)    | 1 (9.1)     | 1 (9.1)       |
| Not applicable                                                                  | 0 (0.0)    | 0 (0.0)     | 1 (9.1)       |
| <b>Temporary leave of rooming-in visitor from patient room is allowed</b>       |            |             |               |
| Yes                                                                             | 5 (45.5)   | 5 (45.5)    | 4 (36.4)      |
| No                                                                              | 5 (45.5)   | 5 (45.5)    | 5 (45.5)      |
| Not applicable                                                                  | 1 (9.1)    | 1 (9.1)     | 2 (18.2)      |

Data are N (%). *CPPA* carbapenemase-producing *Pseudomonas aeruginosa*, *CPE* carbapenemase-producing Enterobacterales, *ESBL-E* extended-spectrum  $\beta$ -lactamase-producing Enterobacterales, *IPC* infection prevention and control, *N/A* not applicable.

<sup>1</sup> Multiple answers per hospital possible.

<sup>2</sup> One hospital has no specific policy on this topic in place.

**Table A4** Cleaning and disinfection after discharge of the patient (n=11 hospitals).

|                                                               | CPE                    | CPPA                   | ESBL-E                 |
|---------------------------------------------------------------|------------------------|------------------------|------------------------|
| <b>Cleaning product for final cleaning<sup>1,2</sup></b>      |                        |                        |                        |
| Reusable microfiber cloth                                     | 2 (18.2)               | 2 (18.2)               | 2 (18.2)               |
| Reusable mop                                                  | 2 (18.2)               | 2 (18.2)               | 2 (18.2)               |
| Disposable (microfiber) cloth                                 | 5 (45.5)               | 5 (45.5)               | 5 (45.5)               |
| Disposable mop                                                | 5 (45.5)               | 5 (45.5)               | 5 (45.5)               |
| No separate cleaning <sup>3</sup>                             | 3 (27.3)               | 3 (27.3)               | 2 (18.2)               |
| Not applicable                                                | 0 (0.0)                | 0 (0.0)                | 1 (9.1)                |
| <b>Method or product for final disinfection<sup>1,2</sup></b> |                        |                        |                        |
| Chlorine 250 ppm                                              | 5 (45.5)               | 5 (45.5)               | 5 (45.5)               |
| Chlorine 1000 ppm                                             | 2 (18.2)               | 2 (18.2)               | 1 (9.1)                |
| Alcohol 70%                                                   | 6 (54.5)               | 6 (54.5)               | 4 (36.4)               |
| 2-in-1 cleaning and disinfection product                      | 3 (27.3)               | 3 (27.3)               | 2 (18.2)               |
| Hydrogen peroxide wipes                                       | 1 (9.1)                | 1 (9.1)                | 1 (9.1)                |
| No disinfection                                               | 0 (0.0)                | 0 (0.0)                | 1 (9.1)                |
| Not applicable                                                | 0 (0.0)                | 0 (0.0)                | 1 (9.1)                |
| <b>Changing separation curtains after isolation</b>           |                        |                        |                        |
| Yes                                                           | 9 (81.8)               | 9 (81.8)               | 7 (63.6)               |
| No                                                            | 2 (18.2) <sup>4</sup>  | 2 (18.2) <sup>4</sup>  | 3 (27.3) <sup>4</sup>  |
| Not applicable                                                | 0 (0.0)                | 0 (0.0)                | 1 (9.1)                |
| <b>Changing window curtains after isolation</b>               |                        |                        |                        |
| Yes                                                           | 1 (9.1)                | 1 (9.1)                | 0 (0.0)                |
| No                                                            | 10 (90.9) <sup>4</sup> | 10 (90.9) <sup>4</sup> | 10 (90.9) <sup>4</sup> |
| Not applicable                                                | 0 (0.0)                | 0 (0.0)                | 1 (9.1)                |

Data are N (%). CPPA carbapenemase-producing *Pseudomonas aeruginosa*, CPE carbapenemase-producing Enterobacterales, ESBL-E extended-spectrum  $\beta$ -lactamase-producing Enterobacterales.

<sup>1</sup> Multiple answers per hospital possible.

<sup>2</sup> Missing data from one hospital.

<sup>3</sup> No separate cleaning due to the use of a 2-in-1 cleaning and disinfection product.

<sup>4</sup> One hospital does not generally change the separation or window curtains after cessation of isolation measures, but only in case of visible contamination or if the patient provides a reason to do so (e.g., demented patient).
